# Supplementary material for: Dissolution induced self-selective Zn- and Ru-doped TiO2 structure for electrochemical generation of KClO3
Source: Royal Society of Chemistry journal article supplement (doi:10.1039/c7cy01849e), 2017-12-29
Supplement: c7cy01849e1.pdf [file c7cy01849e1.pdf]

## **Electronic Supporting Information**

### **Dissolution Induced Self-Selective Zn- and Ru-doped TiO<sub>2</sub> Structure for Electrochemical Generation of KClO<sub>3</sub>**

**Sulay Saha<sup>#</sup>, Koshal Kishor<sup>#</sup>, and Raj Ganesh S. Pala<sup>\*</sup>**

**Department of Chemical Engineering, Indian Institute of Technology, Kanpur, 208016,  
India**

**Materials Science Programme, Indian Institute of Technology, Kanpur, 208016, India**

**\*Corresponding authors: [rpala@iitk.ac.in](mailto:rpala@iitk.ac.in)**

**#equally contributed to the work**

**Section S1:** (a) The current density and (b) the rate of reduction in current density of engineered (Zn, Ru)-doped  $\text{TiO}_2$  ( $\text{Ru}_{0.26}\text{Ti}_{0.73}\text{Zn}_{0.01}\text{O}_x$ ) electrocatalyst at an electrochemical potential of 1.35 V vs Ag/AgCl in neutral 0.5 M KCl solution. The electrolyte is change after 7 hours. (Page 3)

**Section S2:** Individual fitted XPS peaks of Ru-3d zone (278 eV-292 eV) of engineered (Zn, Ru)-doped  $\text{TiO}_2$  ( $\text{Ru}_{0.26}\text{Ti}_{0.73}\text{Zn}_{0.01}\text{O}_x$ ), untreated (Zn, Ru)-doped  $\text{TiO}_2$  ( $\text{Ru}_{0.31}\text{Ti}_{0.67}\text{Zn}_{0.02}\text{O}_x$ ), Ru-doped  $\text{TiO}_2$  having a composition of  $\text{Ru}_{0.3}\text{Ti}_{0.7}\text{O}_2$  and  $\text{RuO}_2$ . (Page 4-7)

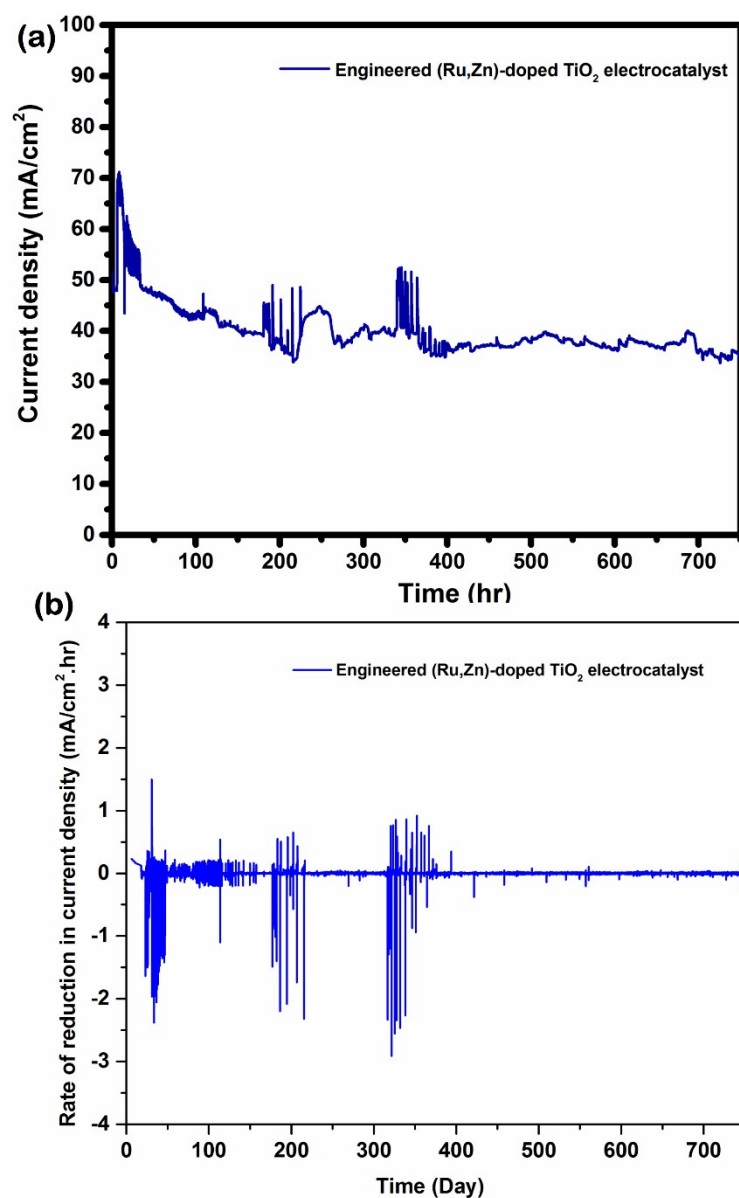

**Fig. S1:** (a) The current density and (b) the rate of reduction in current density of engineered (Zn, Ru)-doped  $\text{TiO}_2$  ( $\text{Ru}_{0.26}\text{Ti}_{0.73}\text{Zn}_{0.01}\text{O}_x$ ) electrocatalyst at an electrochemical potential of 1.35 V vs Ag/AgCl in neutral 0.5 M KCl solution. The electrolyte was changed after 7 hours. The positive values and the negative values in Figure (b) represent reduction in current density and increase in current density due to (1) increase in ECSA or (2) change in electrolyte.

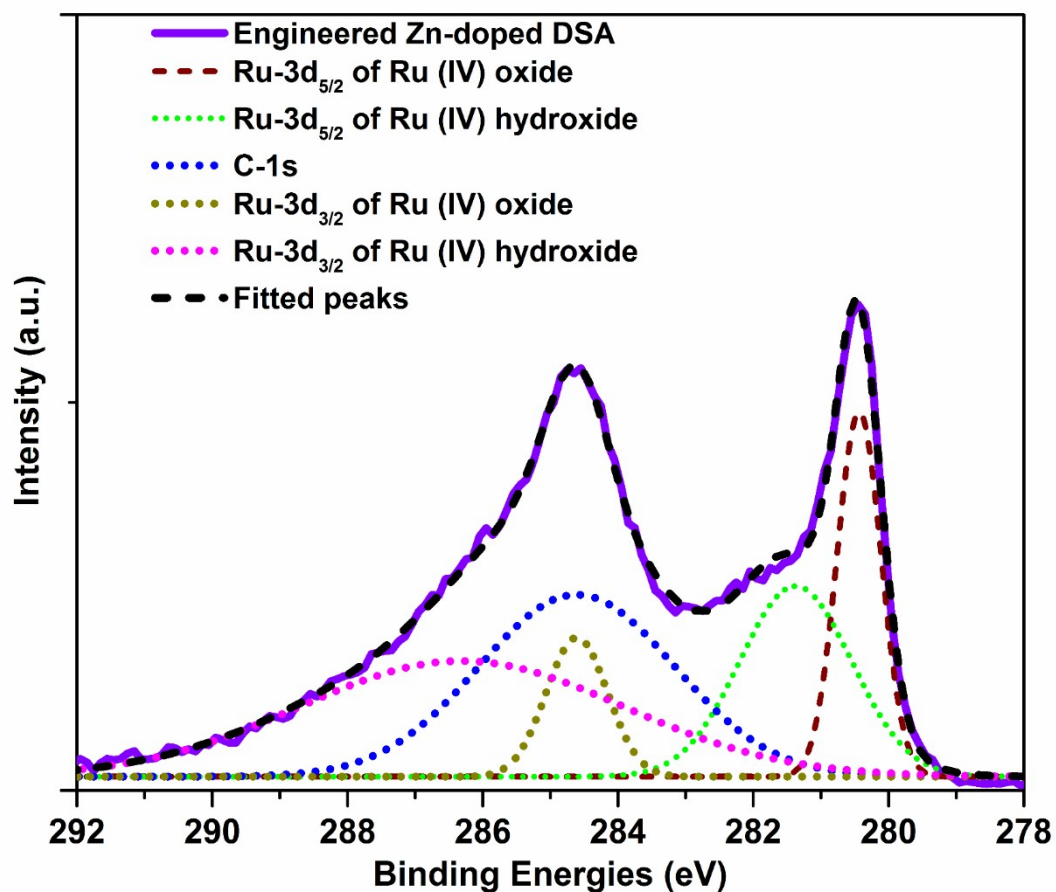

**Fig. S2:** Fitted XPS peaks of Ru-3d zone (278 eV-292 eV) of engineered Zn-doped DSA electrocatalyst.

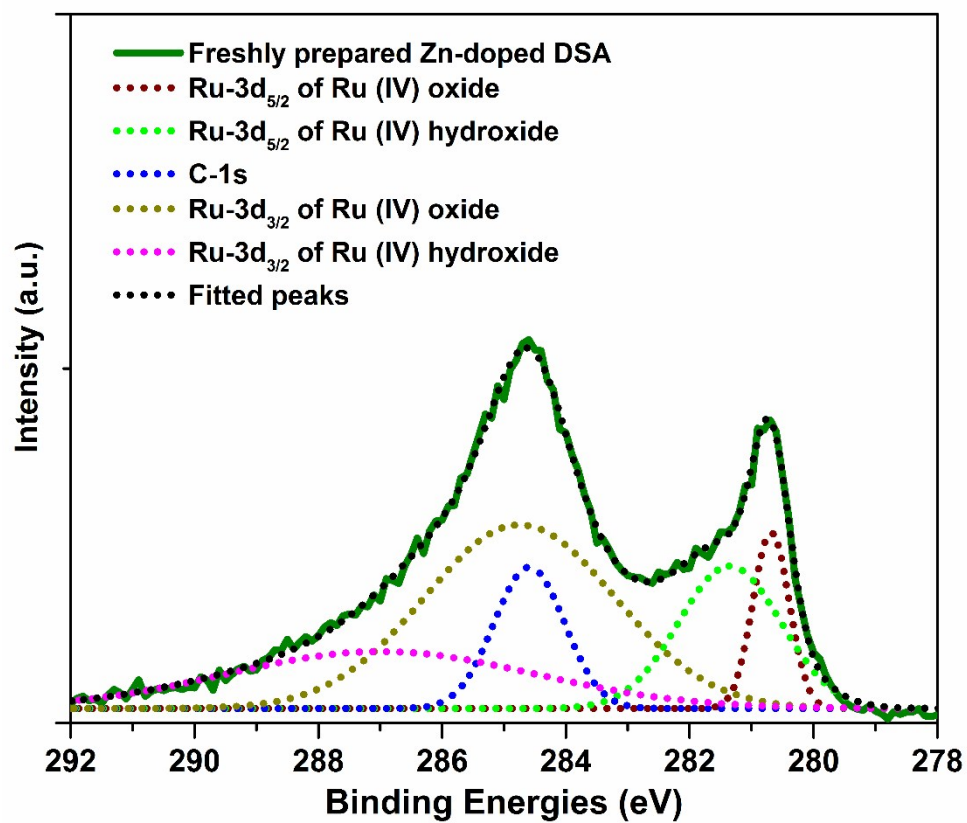

**Fig. S3:** Fitted XPS peaks of Ru-3d zone (278 eV-292 eV) of freshly prepared Zn-doped DSA electrocatalyst.

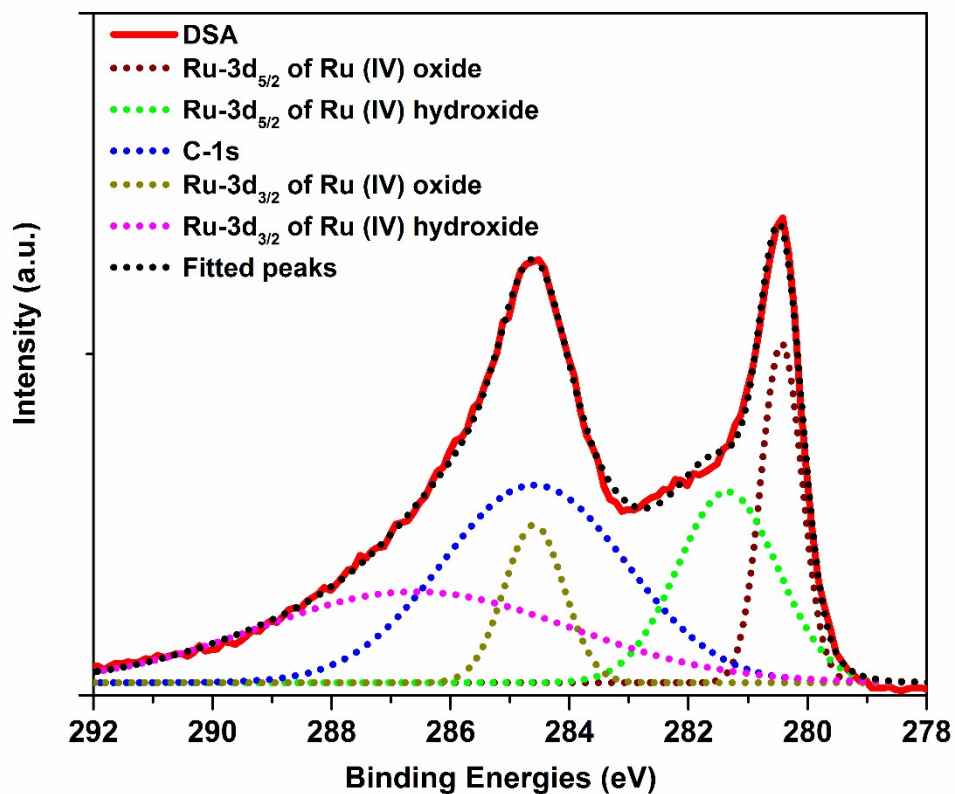

**Fig. S4:** Fitted XPS peaks of Ru-3d zone (278 eV-292 eV) of freshly prepared DSA electrocatalyst

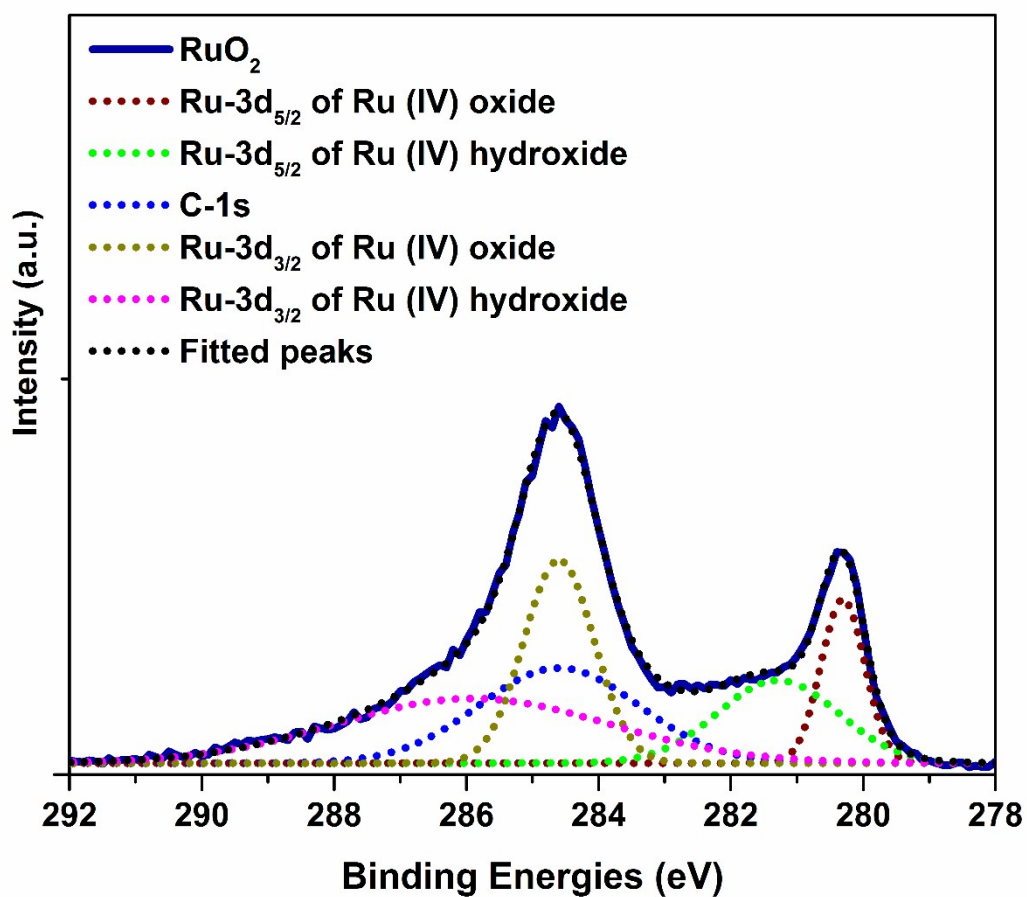

**Fig. S5:** Fitted XPS peaks of Ru-3d zone (278 eV-292 eV) of RuO<sub>2</sub> electrocatalyst.
